# Supplementary material for: Various recurrence dynamics for non-small cell lung cancer depending on pathological stage and histology after surgical resection
Source: PubMed Central journal article supplement — Transl Lung Cancer Res. 2022 Jul;11(7):1327–36. doi: 10.21037/tlcr-21-1028 (PMC9359948; doi:10.21037/tlcr-21-1028), 2022-07
Supplement: tlcr-11-07-1327-dss.pdf [file tlcr-11-07-1327-dss.pdf]

## Data Sharing Statement

|                     |                                                                                                                                                    |                                                                                                   |
|---------------------|----------------------------------------------------------------------------------------------------------------------------------------------------|---------------------------------------------------------------------------------------------------|
| <b>Article Info</b> | <a href="https://dx.doi.org/10.21037/tlcr-21-1028">https://dx.doi.org/10.21037/tlcr-21-1028</a>                                                    |                                                                                                   |
| <b>Item</b>         | <b>Question</b>                                                                                                                                    | <b>Authors' Response<br/>(place "-" if not applicable)</b>                                        |
| 1                   | Would you like to share data collected for your study to others?                                                                                   | No                                                                                                |
| 2                   | If not, would you like to share the reason for your decision?                                                                                      | Copyright of the raw data belongs to several professors, and some of them did not agree to share. |
| 3                   | What data in particular will be shared?                                                                                                            | -                                                                                                 |
| 4                   | Any other documents will be share? Such as study protocol, statistical analysis plan, informed consent form, clinical study report, analytic code. | -                                                                                                 |
| 5                   | When will data availability begin?                                                                                                                 | -                                                                                                 |
| 6                   | When will data availability end?                                                                                                                   | -                                                                                                 |
| 7                   | To whom will you share the data?                                                                                                                   | -                                                                                                 |
| 8                   | For what type of analysis or purpose?                                                                                                              | -                                                                                                 |
| 9                   | How or where can the data/documents be obtained?                                                                                                   | -                                                                                                 |
| 10                  | Any other restrictions?                                                                                                                            | -                                                                                                 |
