# Supplementary material for: Various recurrence dynamics for non-small cell lung cancer depending on pathological stage and histology after surgical resection
Source: PubMed Central journal article supplement — Transl Lung Cancer Res. 2022 Jul;11(7):1327–36. doi: 10.21037/tlcr-21-1028 (PMC9359948; doi:10.21037/tlcr-21-1028), 2022-07
Supplement: tlcr-11-07-1327-supplementary.pdf [file tlcr-11-07-1327-supplementary.pdf]

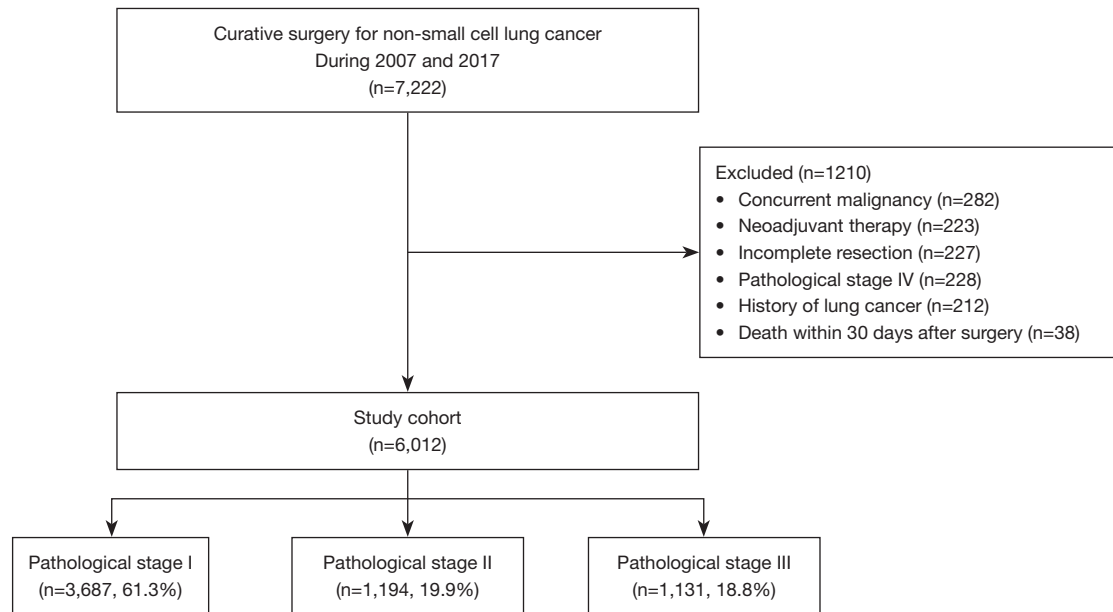

Figure S1 Inclusion criteria.

Table S1 Detailed rates of adjuvant therapy according to pathological stage

|                   | pStage I (n=3,687) | pStage II (n=1,194) | pStage III (n=1,131) | P value |
|-------------------|--------------------|---------------------|----------------------|---------|
| Chemotherapy      | 85 (2.3%)          | 399 (33.4%)         | 449 (39.7%)          | <0.001  |
| Radiotherapy      | 9 (0.2%)           | 52 (4.4%)           | 259 (22.9%)          | <0.001  |
| Chemoradiotherapy | 2 (0.1%)           | 43 (3.6%)           | 264 (23.3%)          | <0.001  |
| None              | 3,591 (97.4%)      | 700 (58.6%)         | 284 (25.1%)          | <0.001  |

pStage, pathological stage.

**Table S2** Recurrence pattern for overall patients with non-small cell lung cancer

|                         |               |                        | Recurrence pattern |              |             |
|-------------------------|---------------|------------------------|--------------------|--------------|-------------|
|                         |               |                        | Loco-regional      | Distant      | Mixed       |
| Total patients (n=1658) |               |                        | 431 (26.0%)        | 1084 (65.4%) | 186 (11.2%) |
| Recurrence site         | Loco-regional | Mediastinal lymph node | 64 (14.8%)         |              | 99 (53.2%)  |
|                         |               | Bronchus stump         | 69 (16.0%)         |              | 31 (16.7%)  |
|                         |               | Lung                   | 70 (16.2%)         |              | 40 (21.5%)  |
|                         |               | Chest wall             | 139 (32.3%)        |              | 11 (5.9%)   |
|                         |               | Others                 | 89 (20.6%)         |              | 6 (3.2%)    |
|                         | Distant       | Brain                  |                    | 192 (17.7%)  | 9 (4.8%)    |
|                         |               | Bone                   |                    | 196 (18.1%)  | 40 (21.5%)  |
|                         |               | Liver                  |                    | 65 (6.0%)    | 17 (9.1%)   |
|                         |               | Mediastinal lymph node |                    | 76 (7.0%)    | 41 (22.0%)  |
|                         |               | Adrenal gland          |                    | 47 (4.3%)    | 5 (2.7%)    |
|                         |               | Kidney                 |                    | 8 (0.7%)     | 2 (1.1%)    |
|                         |               | Lung                   |                    | 522 (48.2%)  | 70 (37.6%)  |
|                         |               | Other lymph node       |                    | 119 (11.0%)  | 46 (24.7%)  |
|                         |               | Others                 |                    | 112 (10.3%)  | 39 (21.0%)  |

**Table S3** Details of the recurrence detection mode

|                                             | Total        | Recurrence pattern |             |             |
|---------------------------------------------|--------------|--------------------|-------------|-------------|
|                                             |              | Loco-regional      | Distant     | Mixed       |
| The number of cases                         | 1658         | 431                | 1084        | 186         |
| The presence of recurrence-related symptom  | 472 (28.5%)  | 15 (3.5%)          | 385 (35.5%) | 72 (38.7%)  |
| Unplanned visit for recurrence <sup>a</sup> | 196 (11.8%)  | 9 (2.1%)           | 132 (12.2%) | 55 (29.6)   |
| Pathologically confirmed cancer recurrence  | 441 (26.6%)  | 130 (30.2%)        | 272 (25.1%) | 39 (21.0%)  |
| Initial modality for recurrence detection   |              |                    |             |             |
| - Symptom                                   | 85 (5.1%)    | 3 (0.7%)           | 34 (31.4%)  | 48 (25.8%)  |
| - Physical examination                      | 9 (0.5%)     | 0                  | 2 (0.2%)    | 7 (3.7%)    |
| - Chest CT                                  | 1168 (70.4%) | 416 (96.5%)        | 720 (66.4%) | 32 (17.2%)  |
| - PET scan                                  | 187 (11.3%)  | 10 (2.3%)          | 45 (4.2%)   | 132 (71.0%) |
| - Brain MRI                                 | 245 (14.8%)  | 0                  | 177 (16.3%) | 68 (36.6%)  |
| - Bone scan                                 | 37 (2.2%)    | 0                  | 9 (0.8%)    | 28 (15.1%)  |

<sup>a</sup>, A recurrence diagnosed not by a scheduled outpatient clinic, such as emergency room or unplanned outpatient clinic visit after follow-up loss. CT, computed tomography; PET, positron emission tomography; MRI, magnetic resonance imaging.

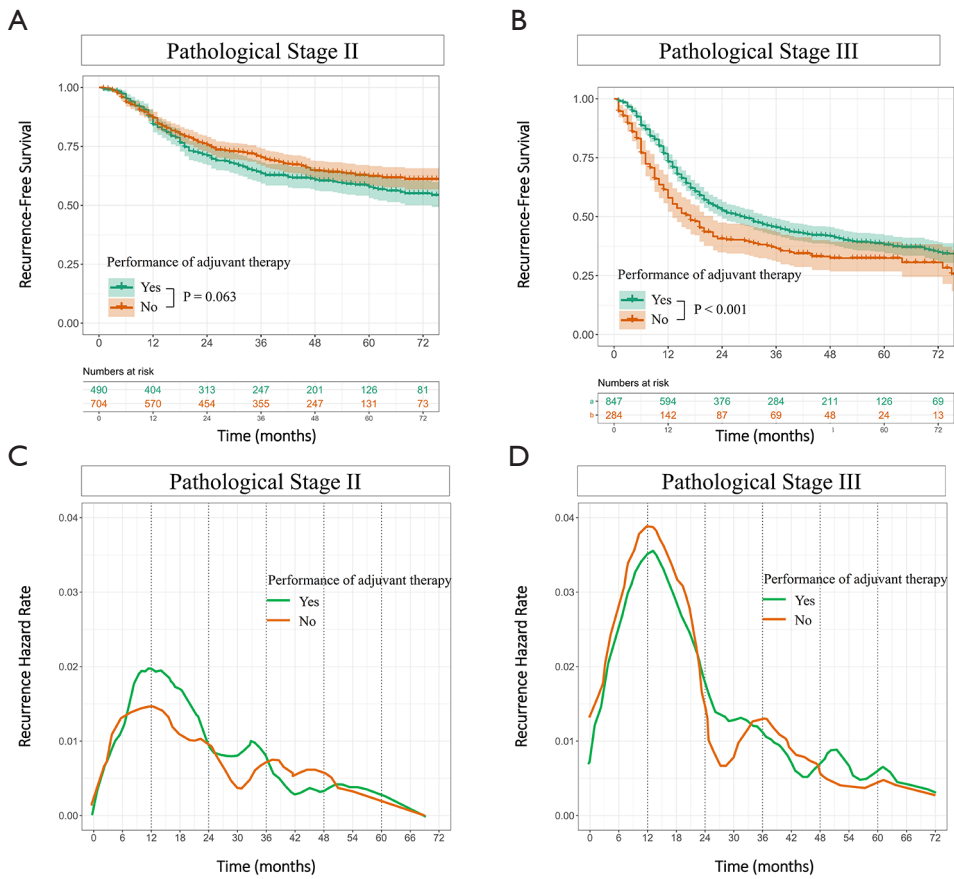

**Figure S2** Recurrence-free survival following the performance of adjuvant therapy in patients with pathological stage II (A) and III (B). The hazard rate for recurrence following the performance of adjuvant therapy in patients with pathological stage II (C) and III (D).
